# Supplementary material for: Novel hetarylazo dyes containing tetrazole and hydroquinoline moieties: spectral characteristics, solvatochromism and photochemistry
Source: Royal Society of Chemistry journal article supplement (doi:10.1039/c6pp00251j), 2016-10-31
Supplement: c6pp00251j1.pdf [file c6pp00251j1.pdf]

ELECTRONIC SUPPORTING INFORMATION

**Novel hetarylazo dyes containing tetrazole and hydroquinoline moieties:**

**Spectral characteristics, solvatochromism and photochemistry**

Tatiana D. Nekipelova<sup>a\*</sup>, Evgenii N. Khodot<sup>b</sup>, Olga N. Klimovich<sup>a</sup> (Lygo), Lidiya N.

Kurkovskaya<sup>a</sup>, Irina I. Levina<sup>a</sup> and Vladimir A. Kuzmin<sup>a</sup>

<sup>a</sup>Emanuel Institute of Biochemical Physics, Russian Academy of Sciences, Moscow, 119334

Russia

<sup>b</sup>Zelinsky Institute of Organic Chemistry, Russian Academy of Sciences, Moscow, 119991

Russia

(A)

## Display Report

### Analysis Info

Analysis Name D:\Data\Kolotyrkina\2016\Hodot\0901001.d  
Method tune\_low.m  
Sample Name /KHOD 928  
Comment C13H17N7O mH 288.156 clb added

Acquisition Date 01.09.2016 12:36:00

Operator BDAL@DE  
Instrument / Ser# micrOTOF 10248

### Acquisition Parameter

|             |            |                      |          |                  |           |
|-------------|------------|----------------------|----------|------------------|-----------|
| Source Type | ESI        | Ion Polarity         | Positive | Set Nebulizer    | 0.4 Bar   |
| Focus       | Not active |                      |          | Set Dry Heater   | 180 °C    |
| Scan Begin  | 50 m/z     | Set Capillary        | 4500 V   | Set Dry Gas      | 4.0 l/min |
| Scan End    | 3000 m/z   | Set End Plate Offset | -500 V   | Set Divert Valve | Waste     |

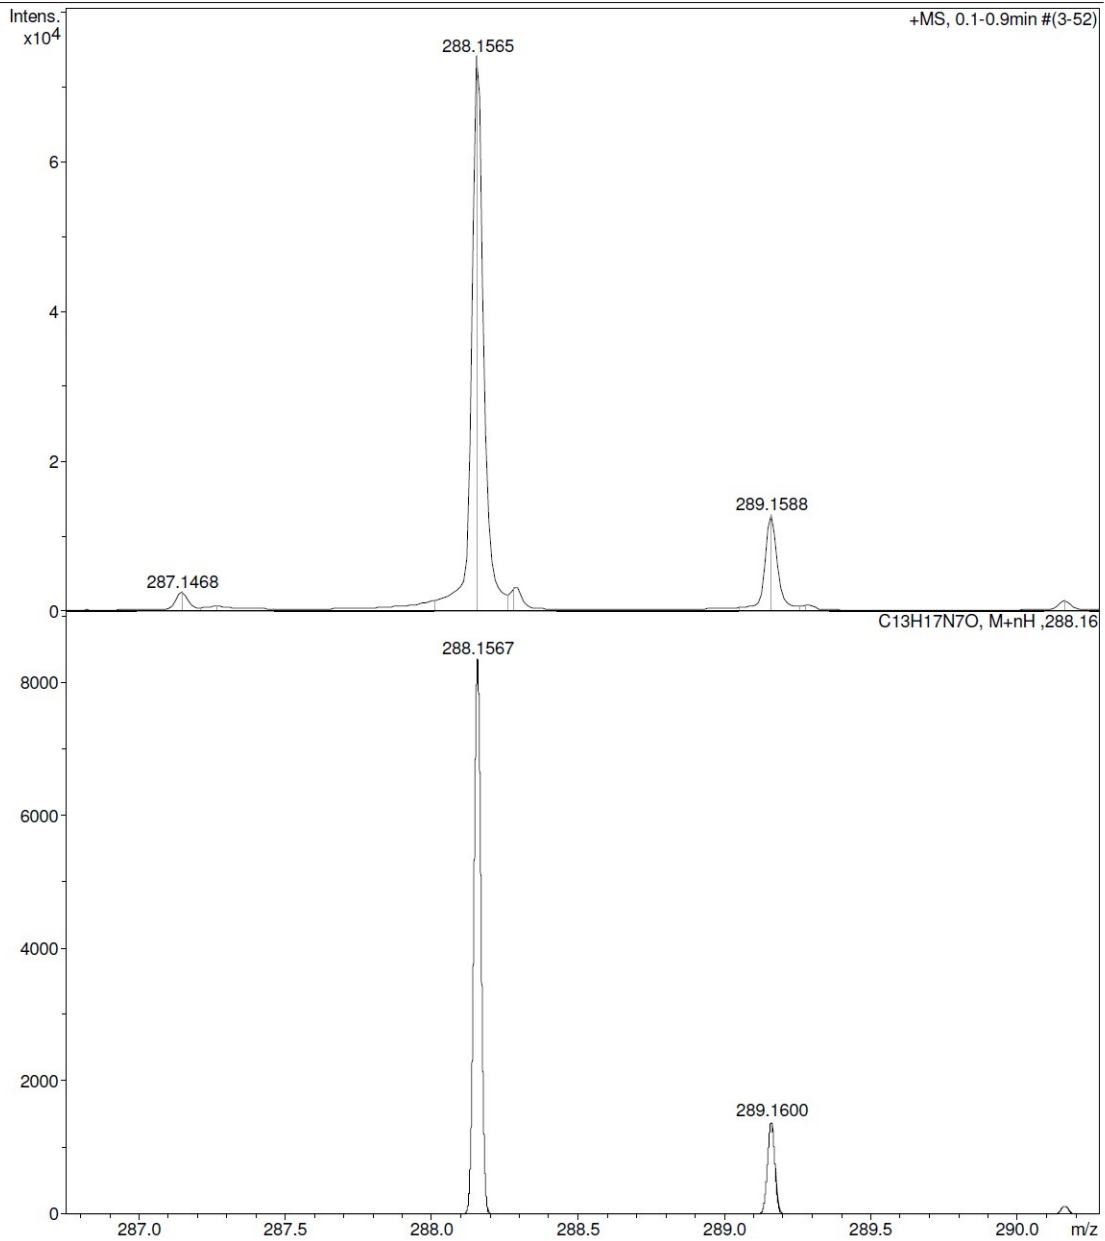

(B)

## Display Report

### Analysis Info

Analysis Name D:\Data\Kolotyrkina\2016\Hodot\0901002.d  
Method tune\_low.m  
Sample Name /KHOD 929  
Comment C14H17N7O mH 300.156 clb added

Acquisition Date 01.09.2016 12:53:30

Operator BDAL@DE  
Instrument / Ser# micrOTOF 10248

### Acquisition Parameter

|             |            |                      |          |                  |           |
|-------------|------------|----------------------|----------|------------------|-----------|
| Source Type | ESI        | Ion Polarity         | Positive | Set Nebulizer    | 0.4 Bar   |
| Focus       | Not active |                      |          | Set Dry Heater   | 180 °C    |
| Scan Begin  | 50 m/z     | Set Capillary        | 4500 V   | Set Dry Gas      | 4.0 l/min |
| Scan End    | 3000 m/z   | Set End Plate Offset | -500 V   | Set Divert Valve | Waste     |

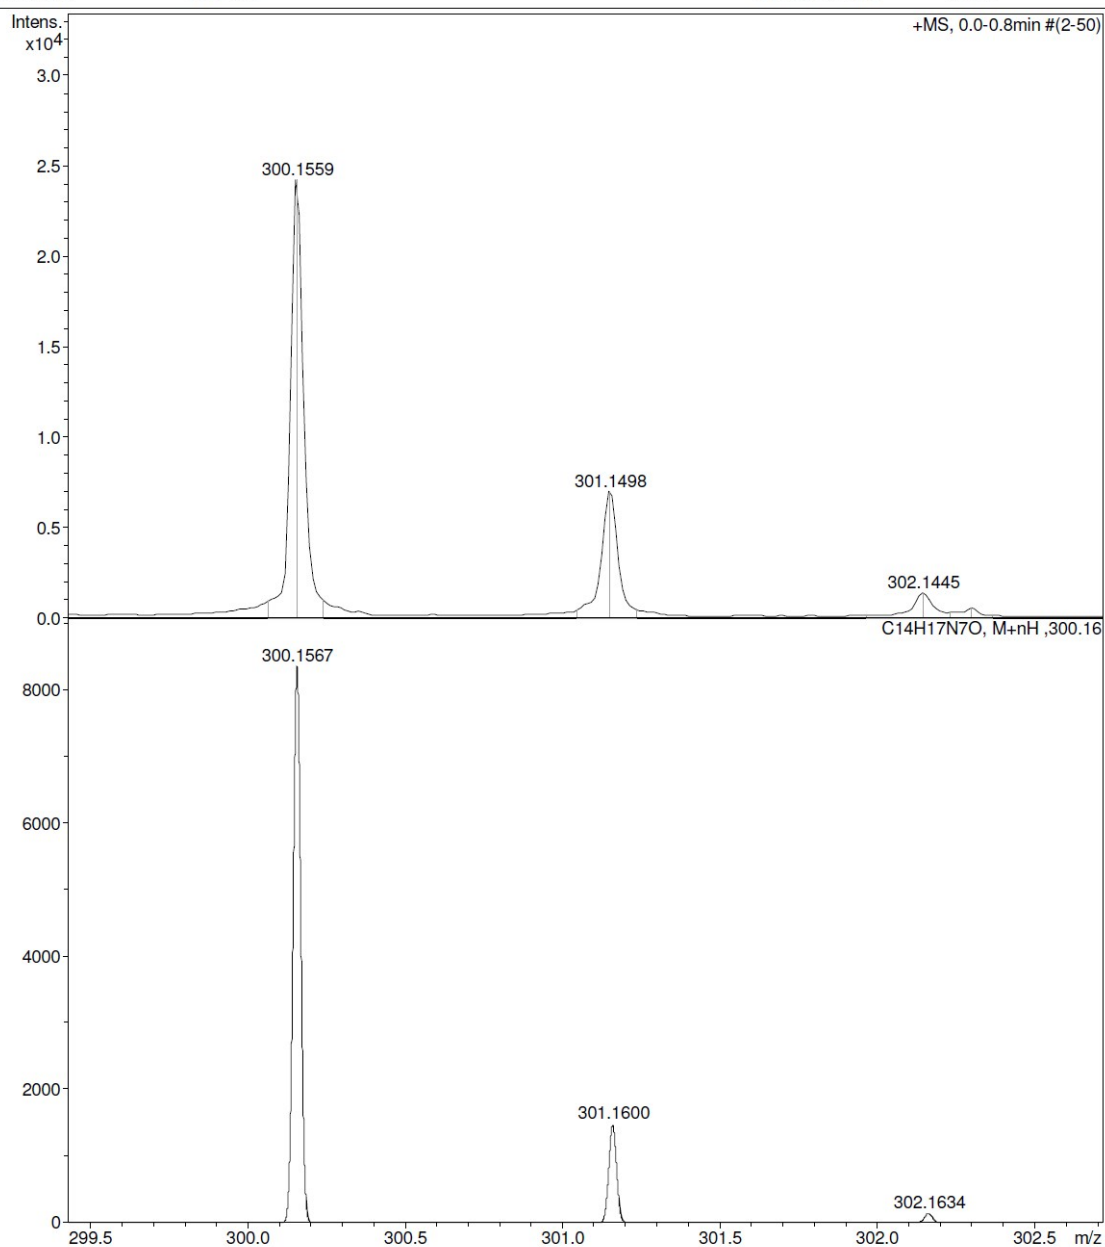

Figure S1 HRMS spectra of dyes 3 (A) and 4 (B).

### Absorption spectra of dyes 4 and 5 in different solvents at different concentrations

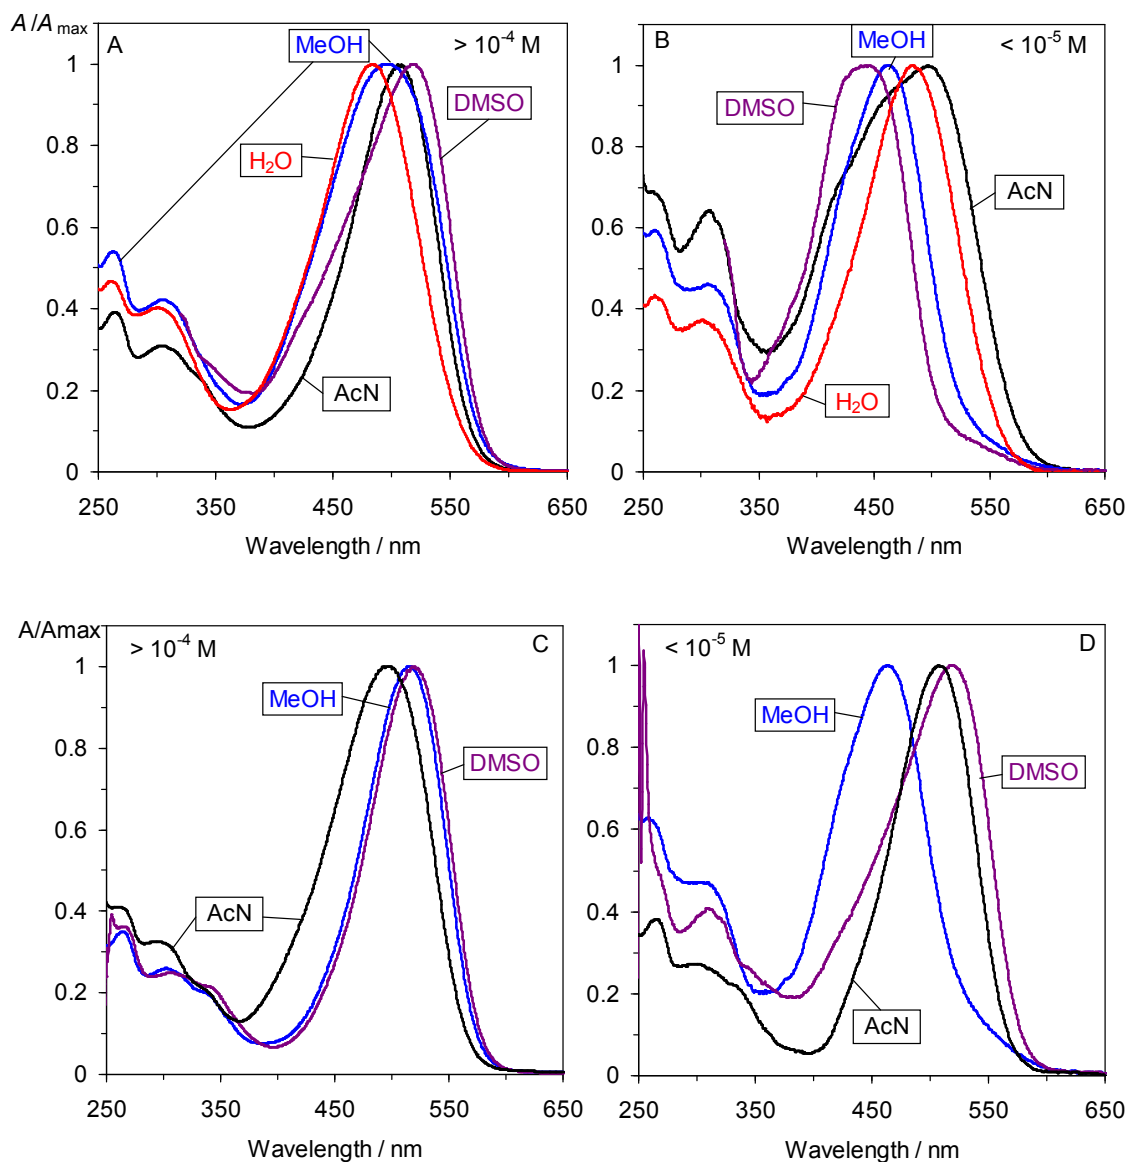

**Figure S2** Normalized absorption spectra of dyes 4 (A, B) and 5 (C, D) at concentrations  $> 1 \times 10^{-4}$  M (A, C) and  $< 1 \times 10^{-5}$  M (B, D) in different solvents.

## Gaussian deconvolution of the spectra for 3 and 4 in various solvents

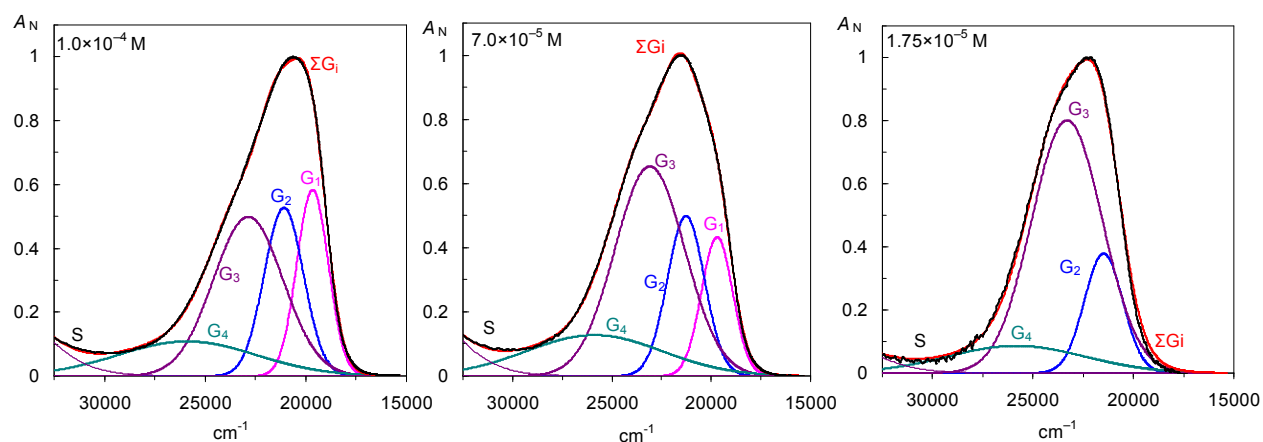

**Figure S3.** Deconvolution of normalized absorption spectra of **3** at different concentrations in MeOH.

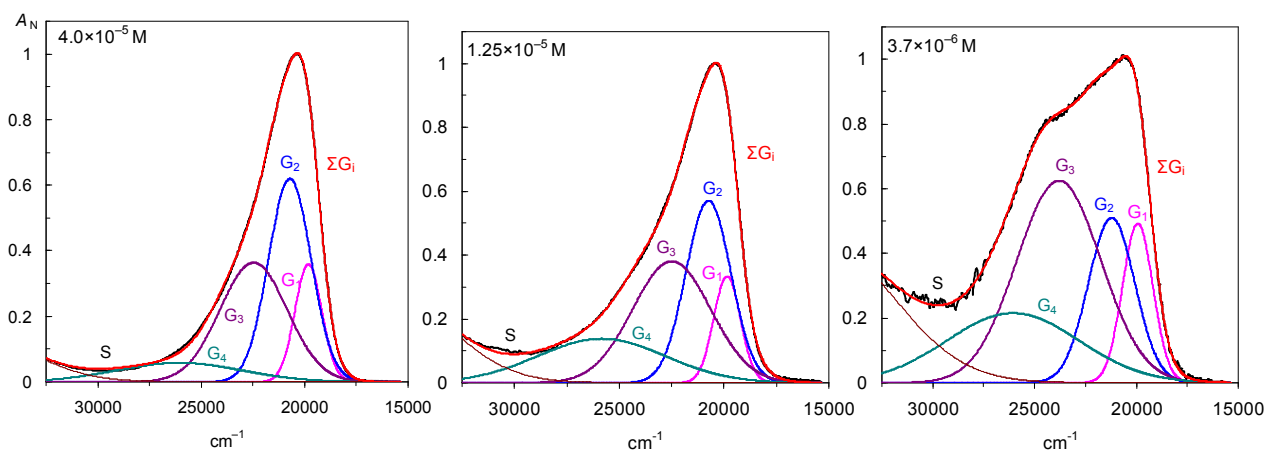

**Figure S4.** Gaussian deconvolution of normalized absorption spectra of dye **3** at different concentrations in ACN.

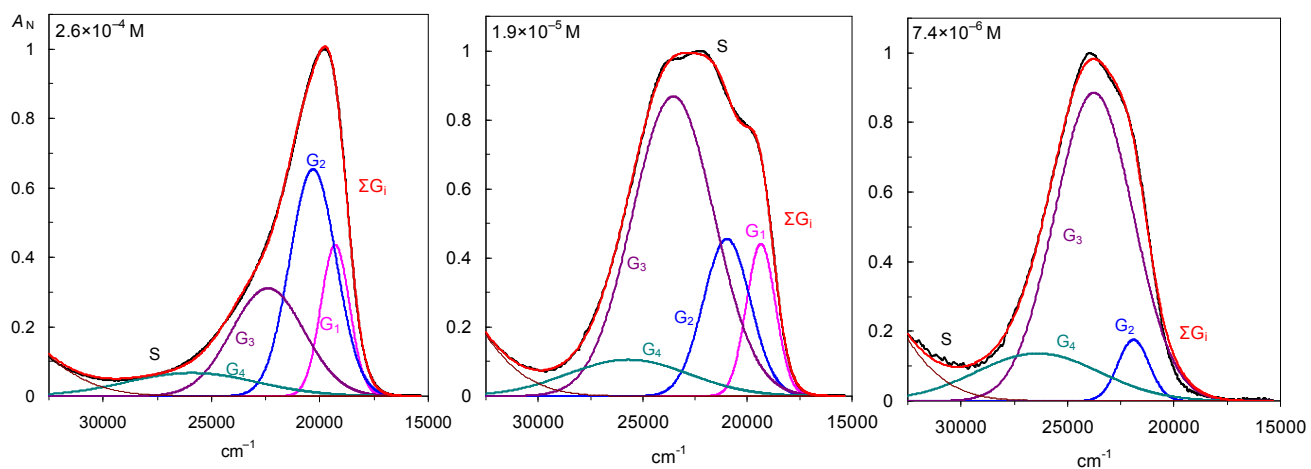

**Figure S5.** Gaussian deconvolution of normalized absorption spectra of dye **3** at different concentrations in DMSO.

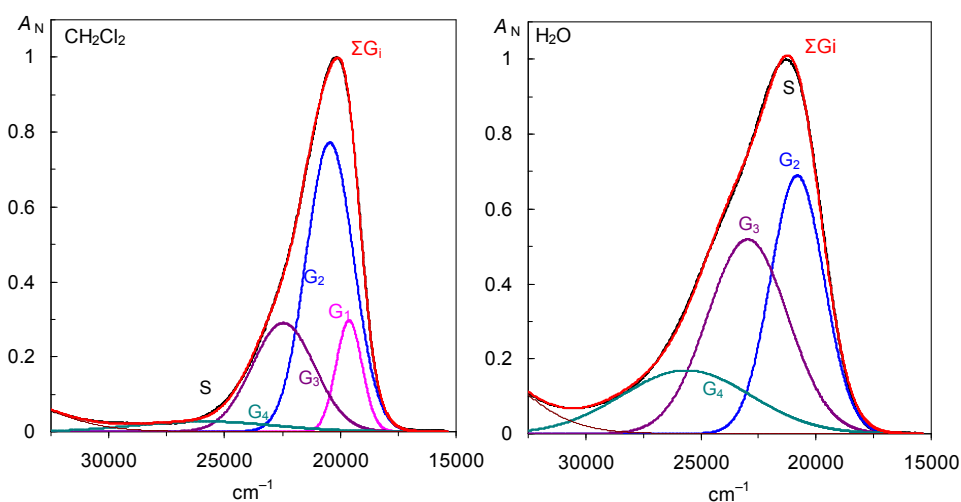

**Figure S6.** Gaussian deconvolution of normalized absorption spectra of dye **3** in  $\text{CH}_2\text{Cl}_2$  and water

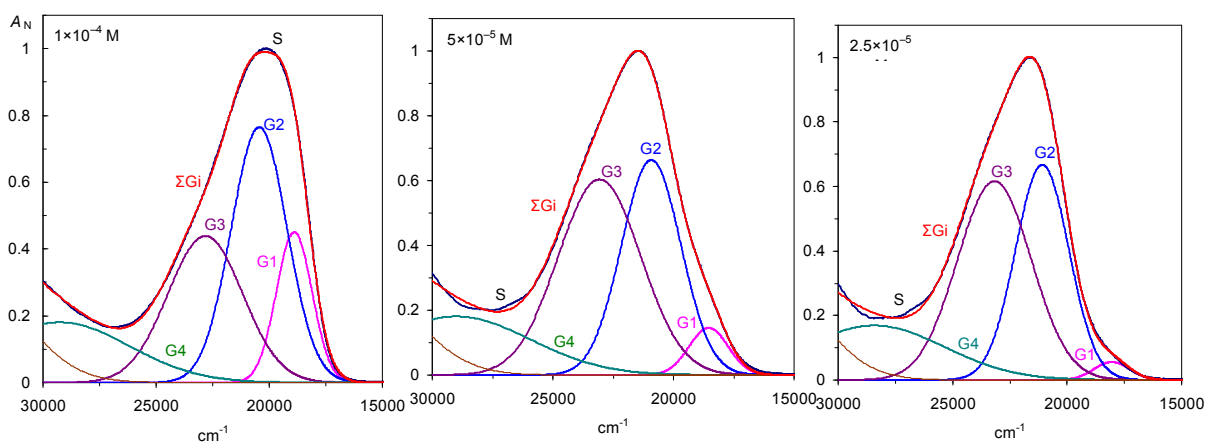

**Figure S7.** Gaussian deconvolution of normalized absorption spectra of dye **4** at different concentrations in MeOH.

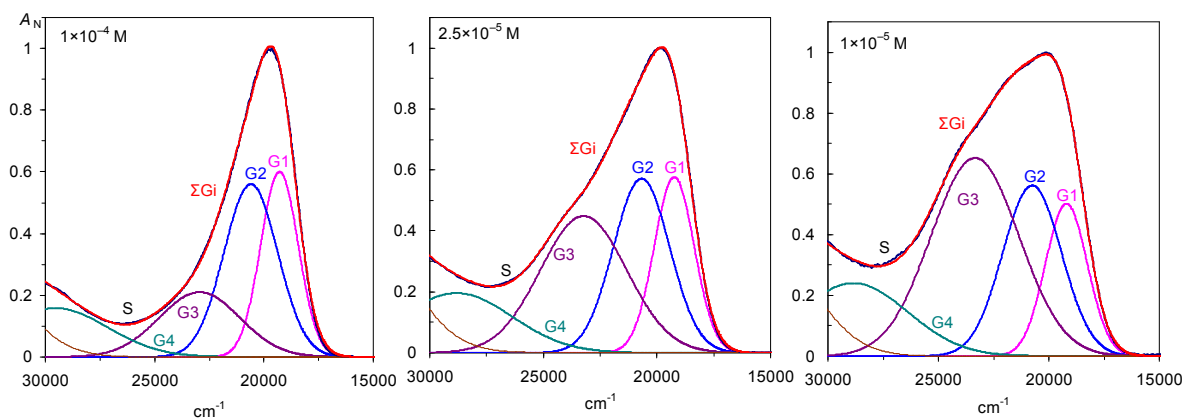

**Figure S8.** Gaussian deconvolution of normalized absorption spectra of dye **4** at different concentrations in AcN.

**Table S1.** Parameters of the Gaussian functions (wavenumbers, FWMH in  $\text{cm}^{-1}$  and  $H$  - height) in deconvolution of the normalized absorption spectra for **3** in various solvents at different concentrations

| $C/10^{-5}$<br>M | MeOH                        |                             |                             |                             |
|------------------|-----------------------------|-----------------------------|-----------------------------|-----------------------------|
|                  | G1(19780±100)<br>$H$ (FWMH) | G2(21340±250)<br>$H$ (FWMH) | G3(23060±50)<br>$H$ (FWMH)  | G4(25850±60)<br>$H$ (FWMH)  |
| 0.38             | 0                           | 0.26 (2257)                 | 0.70 (4142)                 | 0.18 (8043)                 |
| 1.74             | 0                           | 0.35 (2257)                 | 0.80 (4142)                 | 0.086 (8043)                |
| 5.20             | 0.11 (1857)                 | 0.35 (2257)                 | 0.76 (4142)                 | 0.16 (8043)                 |
| 7.00             | 0.43 (1852)                 | 0.50 (2201)                 | 0.65 (4146)                 | 0.13 (8031)                 |
| 8.70             | 0.58 (1880)                 | 0.53 (2267)                 | 0.54 (4210)                 | 0.11 (8047)                 |
| 10.5             | 0.59 (1840)                 | 0.54 (2303)                 | 0.49 (4071)                 | 0.10 (8050)                 |
| 41.8             | 0.57 (1802)                 | 0.52(2190)                  | 0.36 (3964)                 | 0.07 (8082)                 |
|                  | ACN                         |                             |                             |                             |
|                  | G1(19850±100)<br>$H$ (FWMH) | G2(20850±250)<br>$H$ (FWMH) | G3(22850±400)<br>$H$ (FWMH) | G4(25950±100)<br>$H$ (FWMH) |
| 0.37             | 0.49 (1760)                 | 0.51 (2688)                 | 0.62 (4862)                 | 0.22 (7608)                 |
| 0.55             | 0.47 (1725)                 | 0.49 (2630)                 | 0.43 (4876)                 | 0.19 (7304)                 |
| 0.83             | 0.34 (1510)                 | 0.56 (2445)                 | 0.41 (4465)                 | 0.17 (7148)                 |
| 1.86             | 0.38 (1583)                 | 0.57 (2502)                 | 0.36 (4148)                 | 0.11 (7044)                 |
| 2.80             | 0.34 (1516)                 | 0.62 (2489)                 | 0.36 (3994)                 | 0.09 (7052)                 |
| 4.18             | 0.36 (1526)                 | 0.62 (2419)                 | 0.36 (3825)                 | 0.06 (7080)                 |
| 41.8             | 0.33 (1532)                 | 0.64 (2378)                 | 0.37 (3640)                 | 0.05 (7113)                 |
|                  | DMSO                        |                             |                             |                             |
|                  | G1(19350±50)<br>$H$ (FWMH)  | G2(20850±500)<br>$H$ (FWMH) | G3(23110±500)<br>$H$ (FWMH) | G4(25820±500)<br>$H$ (FWMH) |
| 0.74             | 0                           | 0.18 (1722)                 | 0.89 (4356)                 | 0.14 (6830)                 |
| 1.54             | 0.33 (1711)                 | 0.37 (2407)                 | 0.88 (4364)                 | 0.11 (6830)                 |
| 1.91             | 0.44 (1638)                 | 0.45 (2650)                 | 0.87 (4601)                 | 0.11 (6848)                 |
| 2.35             | 0.55 (1652)                 | 0.55 (2656)                 | 0.80 (4633)                 | 0.11 (6859)                 |
| 2.90             | 0.53 (1641)                 | 0.56 (2661)                 | 0.61 (4680)                 | 0.11 (6889)                 |
| 4.18             | 0.50 (1633)                 | 0.59 (2648)                 | 0.40 (4446)                 | 0.09 (6958)                 |
| 7.32             | 0.52 (1639)                 | 0.58 (2509)                 | 0.37 (4380)                 | 0.07 (6907)                 |
| 10.0             | 0.48 (1596)                 | 0.60 (2464)                 | 0.34 (4180)                 | 0.07 (6916)                 |
| 26.1             | 0.44 (1556)                 | 0.65 (2518)                 | 0.31 (3943)                 | 0.07 (7042)                 |
|                  | $\text{CH}_2\text{Cl}_2$    |                             |                             |                             |
|                  | G1(19620)<br>$H$ (FWMH)     | G2(20451)<br>$H$ (FWMH)     | G3(22464)<br>$H$ (FWMH)     | G4(25820±500)<br>$H$ (FWMH) |
| 5-0.1            | 0.30 (1318)                 | 0.77 (2412)                 | 0.29 (3167)                 | 0.03 (7038)                 |
|                  | $\text{H}_2\text{O}$        |                             |                             |                             |
|                  | G1<br>$H$ (FWMH)            | G2(20810)<br>$H$ (FWMH)     | G3(22970)<br>$H$ (FWMH)     | G4(25867)<br>$H$ (FWMH)     |
| 5-0.1            | 0                           | 0.69 (2729)                 | 0.52 (4110)                 | 0.17 (6589)                 |

**Table S2.** Parameters of the Gaussian functions (wavenumbers, FWHM in  $\text{cm}^{-1}$  and  $H$  - height) in deconvolution of the normalized absorption spectra for **4** in various solvents at different concentrations

| C/ $10^{-5}$<br>M | MeOH                                                 |                                                      |                                                      |                                                      |
|-------------------|------------------------------------------------------|------------------------------------------------------|------------------------------------------------------|------------------------------------------------------|
|                   | G1(18600 $\pm$ 300)<br>$H$ (FWMH/ $\text{cm}^{-1}$ ) | G2(20750 $\pm$ 300)<br>$H$ (FWMH/ $\text{cm}^{-1}$ ) | G3(23000 $\pm$ 200)<br>$H$ (FWMH/ $\text{cm}^{-1}$ ) | G4(28940 $\pm$ 300)<br>$H$ (FWMH/ $\text{cm}^{-1}$ ) |
| 10                | 0.45 (1860)                                          | 0.37 (2910)                                          | 0.28 (3890)                                          | 0.21 (7230)                                          |
| 7.5               | 0.40 (1860)                                          | 0.35 (2910)                                          | 0.31 (3890)                                          | 0.22 (7230)                                          |
| 5                 | 0.15 (1900)                                          | 0.32 (2900)                                          | 0.41 (4032)                                          | 0.22 (7250)                                          |
| 2.5               | 0.06 (1830)                                          | 0.33 (2750)                                          | 0.43 (3790)                                          | 0.22 (7230)                                          |
|                   | ACN                                                  |                                                      |                                                      |                                                      |
|                   | G1(19240 $\pm$ 40)<br>$H$ (FWMH/ $\text{cm}^{-1}$ )  | G2(20650 $\pm$ 100)<br>$H$ (FWMH/ $\text{cm}^{-1}$ ) | G3(23100 $\pm$ 200)<br>$H$ (FWMH/ $\text{cm}^{-1}$ ) | G4(29050 $\pm$ 250)<br>$H$ (FWMH/ $\text{cm}^{-1}$ ) |
| 10                | 0.60 (2020)                                          | 0.56 (2900)                                          | 0.21 (4330)                                          | 0.16 (5680)                                          |
| 5                 | 0.59 (2000)                                          | 0.58 (2790)                                          | 0.30 (4330)                                          | 0.16 (5680)                                          |
| 2.5               | 0.58 (2070)                                          | 0.57(2920)                                           | 0.45 (4470)                                          | 0.20 (5740)                                          |
| 1                 | 0.50 (2240)                                          | 0.56 (3140)                                          | 0.65 (4690)                                          | 0.24 (5790)                                          |
|                   | DMSO                                                 |                                                      |                                                      |                                                      |
|                   | G1(18810 $\pm$ 150)<br>$H$ (FWMH/ $\text{cm}^{-1}$ ) | G2(20660 $\pm$ 100)<br>$H$ (FWMH/ $\text{cm}^{-1}$ ) | G3(22600 $\pm$ 400)<br>$H$ (FWMH/ $\text{cm}^{-1}$ ) | G4(26600 $\pm$ 700)<br>$H$ (FWMH/ $\text{cm}^{-1}$ ) |
| 10                | 0.55 (1710)                                          | 0.58 (2560)                                          | 0.42 (4010)                                          | 0.18 (6910)                                          |
| 7.5               | 0.58 (1730)                                          | 0.55 (2540)                                          | 0.50 (4020)                                          | 0.21 (7060)                                          |
| 5                 | 0.58 (1830)                                          | 0.48 (2590)                                          | 0.72 (3920)                                          | 0.31 (7050)                                          |
| 2.5               | 0.16 (2220)                                          | 0.33 (1860)                                          | 0.79 (3730)                                          | 0.32 (6870)                                          |
| 1                 | 0.05 (1850)                                          | 0.37 (1870)                                          | 0.73 (3410)                                          | 0.35 (6750)                                          |



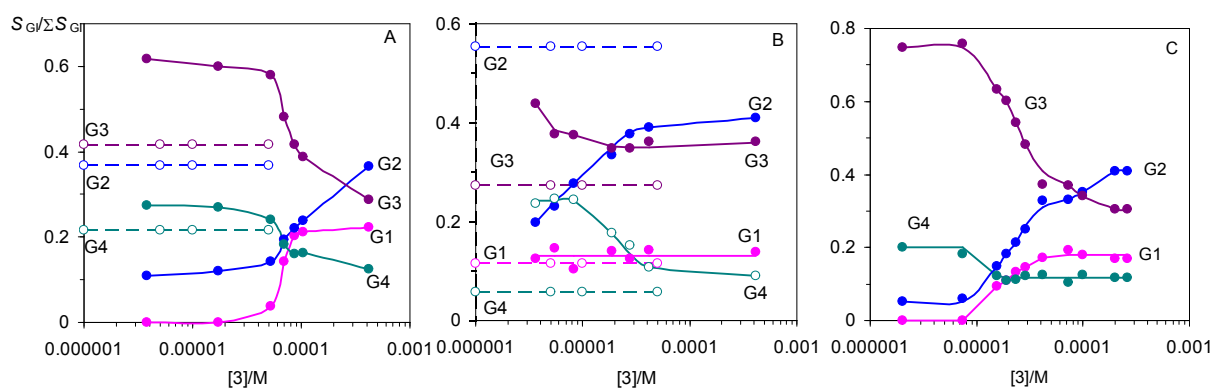

**Figure S9** Contributions of Gaussian components into the visible absorption band at different concentrations of dye **3** in (A) MeOH (solid lines) and H<sub>2</sub>O (dashed lines), (B) ACN (solid lines) and CH<sub>2</sub>Cl<sub>2</sub> (dashed lines) and (C) DMSO

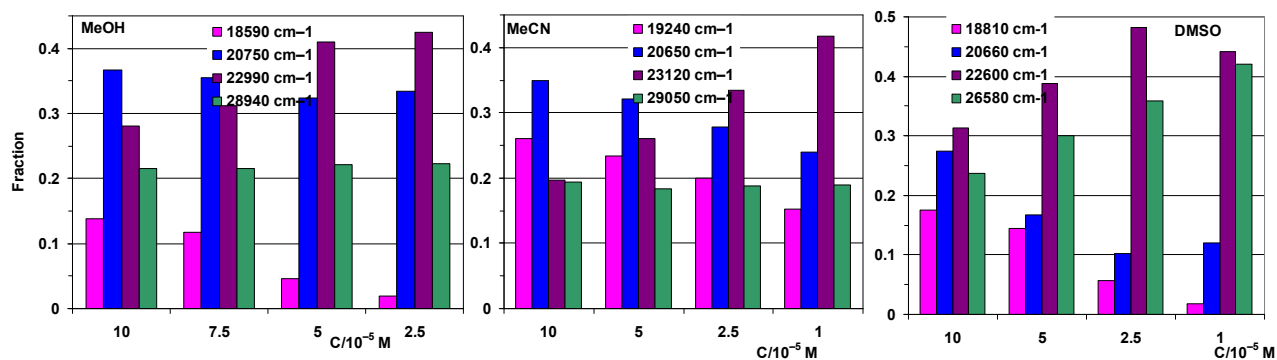

**Figure S10.** Contributions of Gaussian components into the visible absorption band at different concentrations of **4** in MeOH, ACN and DMSO.
